# Supplementary material for: Correlates of COVID-19 Vaccine Hesitancy among a Community Sample of African Americans Living in the Southern United States
Source: MDPI journal article supplement (doi:10.3390/vaccines9080879), 2021-08-08
Supplement: s1 [file s1]

# Supplementary Material

**Table S1.** Multivariable polytomous<sup>1</sup> logistic regression for the association between select participant characteristics with vaccine hesitancy (referent outcome is acceptant), among 257 community participants within the SPARTA & 100 Black Men of Augusta survey by vaccine hesitancy groups.

| Hesitancy Groups                                | No. Participants | Acceptant<br>(n = 175, 68.1%)<br>Referent Outcome | Hesitant<br>(n = 40, 15.6%)  | Resistant<br>(n = 42, 16.3%) |                              |                    |
|-------------------------------------------------|------------------|---------------------------------------------------|------------------------------|------------------------------|------------------------------|--------------------|
| Variable                                        |                  | (% <sup>2</sup> or Mean, SD)                      | (% <sup>2</sup> or Mean, SD) | OR (95% CI)                  | (% <sup>2</sup> or Mean, SD) | OR (95% CI)        |
| Age group, years                                |                  |                                                   |                              |                              |                              |                    |
| 18–29                                           | 38               | 26.3                                              | 26.3                         | 6.80 (1.83–25.31)            | 47.4                         | 21.93 (5.26–91.43) |
| 30–39                                           | 25               | 60.0                                              | 16.0                         | 2.09 (0.45–9.60)             | 24.0                         | 1.93 (0.38–9.69)   |
| 40–49                                           | 38               | 50.0                                              | 26.3                         | 3.64 (1.15–11.49)            | 23.7                         | 4.11 (1.04–16.21)  |
| 50+                                             | 156              | 84.0                                              | 10.3                         | 1.00 (Referent)              | 5.8                          | 1.00 (Referent)    |
| Gender                                          |                  |                                                   |                              |                              |                              |                    |
| Male                                            | 133              | 75.2                                              | 10.5                         | 1.00 (Referent)              | 14.3                         | 1.00 (Referent)    |
| Female                                          | 124              | 60.5                                              | 21.0                         | 3.80 (1.54–9.39)             | 18.6                         | 2.67 (1.00–7.14)   |
| Current health insurance                        |                  |                                                   |                              |                              |                              |                    |
| Yes                                             | 206              | 71.4                                              | 16.0                         | 0.94 (0.30–2.93)             | 12.6                         | 2.87 (1.02–8.10)   |
| No                                              | 51               | 54.9                                              | 13.7                         | 1.00 (Referent)              | 31.4                         | 1.00 (Referent)    |
| Current employment status                       |                  |                                                   |                              |                              |                              |                    |
| Employed full time                              | 130              | 56.2                                              | 19.2                         | 1.00 (Referent)              | 24.6                         | 1.00 (Referent)    |
| Retired                                         | 82               | 87.8                                              | 8.5                          | 0.75 (0.23–2.43)             | 3.7                          | 0.52 (0.10–2.56)   |
| Unemployed                                      | 16               | 50.0                                              | 25.0                         | 1.12 (0.25–5.11)             | 25.0                         | 0.63 (0.12–3.31)   |
| Other <sup>3</sup>                              | 29               | 75.9                                              | 13.8                         | 0.49 (0.13–1.86)             | 10.3                         | 0.18 (0.04–0.84)   |
| High blood pressure                             | 109              | 81.7                                              | 8.3                          | 0.24 (0.06–0.93)             | 10.1                         | 0.82 (0.16–4.13)   |
| Diabetes                                        | 42               | 88.1                                              | 7.1                          | 0.36 (0.06–2.31)             | 4.8                          | 0.35 (0.03–3.61)   |
| Per unit increase in comorbidities <sup>4</sup> | -                | 1.07 (1.19)                                       | 0.53 (0.68)                  | 1.65 (0.75–3.65)             | 0.43 (0.74)                  | 1.42 (0.48–4.24)   |
| Current Smokers                                 | 39               | 53.9                                              | 15.4                         | 1.15 (0.36–3.60)             | 30.8                         | 1.16 (0.37–3.67)   |
| Ever had flu shot                               | 127              | 80.3                                              | 11.0                         | 0.44 (0.19–0.99)             | 8.7                          | 0.39 (0.16–0.97)   |
| Housing insecurity due to COVID-19              | 30               | 40.0                                              | 13.3                         | 1.39 (0.33–5.80)             | 46.7                         | 7.35 (1.99–27.10)  |

<sup>1</sup> The results from the polytomous logistic regression can be interpreted as the log odds of vaccine resistance or hesitance compared to the log odds of vaccine acceptance (the referent vaccine category). Model fully adjusted for age groups, gender, insurance status, employment status, high blood pressure, diabetes, comorbidities, smoking status, ever had flu shot, and housing insecurity due to COVID-19. <sup>2</sup> Presented as proportion within variable strata with vaccine hesitancy belief, row percentage. <sup>3</sup> Other employment includes unemployed, part time, student, and disabled. <sup>4</sup> Total number of comorbidities summed from 8 baseline comorbidities.

**Table S2.** Results for R2 (presented as percentages) values for independently fit models and full model using the polytomous logistic regression, among 257 community participants within the SPARTA & 100 Black Men of Augusta survey by vaccine hesitancy groups.

| Variable/Model                     | $R^2_{Cox \& \ Snell}$ | $R^2_{Nagelkerke}$ |
|------------------------------------|------------------------|--------------------|
| Age group, years                   | 20.55%                 | 25.17%             |
| Gender                             | 2.80%                  | 3.43%              |
| Current health insurance           | 3.55%                  | 4.35%              |
| Current employment status          | 11.42%                 | 13.99%             |
| High blood pressure                | 6.34%                  | 7.77%              |
| Diabetes                           | 4.17%                  | 5.11%              |
| Number of comorbidities            | 7.39%                  | 9.05%              |
| Current tobacco smoker             | 7.59%                  | 9.29%              |
| Ever had flu shot                  | 6.90%                  | 8.45%              |
| Housing insecurity due to COVID-19 | 6.86%                  | 8.41%              |
| <b>Full Model</b>                  | <b>36.73%</b>          | <b>44.99%</b>      |

Model among 257 participants from the SPARTA & 100 Black Men of Augusta survey. Fully adjusted model contains includes age groups, gender, insured status, employment status, hypertension, diabetes, number of comorbidities, smoking status, ever had flu shot, and housing insecurity due to COVID-19. The Cox & Snell and Nagelkerke R2 values are derived using the maximum likelihood function from the fitted models of the polytomous logistic regression models. The Nagelkerke R2 is the “max rescaled” R2 which standardizes percentages to a 0–100% scale. They are analogous to the R2 values derived from the ordinary least squares regression when using linear regression. Independent R2 values do not total to 100% or to the full model R2 because there is collinearity between factors, i.e., overlap in variance explained.
